## RESEARCH ARTICLE

# Environmental salinity modulates the effects of elevated CO<sub>2</sub> levels on juvenile hard-shell clams, *Mercenaria mercenaria*

Gary H. Dickinson<sup>1,2,\*</sup>, Omera B. Matoo<sup>3,\*</sup>, Robert T. Tourek<sup>1</sup>, Inna M. Sokolova<sup>3,†</sup> and Elia Beniash<sup>1,†</sup>

<sup>1</sup>Department of Oral Biology, University of Pittsburgh, 589 Salk Hall, 3501 Terrace Street, Pittsburgh, PA 15261, USA,

<sup>2</sup>Department of Biology, The College of New Jersey, 2000 Pennington Road, Ewing, NJ 08628, USA and <sup>3</sup>Department of Biology, University of North Carolina at Charlotte, 9201 University City Boulevard, Charlotte, NC 28223, USA

\*These authors contributed equally to this work

†Authors for correspondence (isokolov@unccl.edu; ebeniash@pitt.edu)

### SUMMARY

Ocean acidification due to increasing atmospheric CO<sub>2</sub> concentrations results in a decrease in seawater pH and shifts in the carbonate chemistry that can negatively affect marine organisms. Marine bivalves such as the hard-shell clam, *Mercenaria mercenaria*, serve as ecosystem engineers in estuaries and coastal zones of the western Atlantic and, as for many marine calcifiers, are sensitive to the impacts of ocean acidification. In estuaries, the effects of ocean acidification can be exacerbated by low buffering capacity of brackish waters, acidic inputs from freshwaters and land, and/or the negative effects of salinity on the physiology of organisms. We determined the interactive effects of 21 weeks of exposure to different levels of CO<sub>2</sub> (~395, 800 and 1500 µatm corresponding to pH of 8.2, 8.1 and 7.7, respectively) and salinity (32 versus 16) on biomineralization, shell properties and energy metabolism of juvenile hard-shell clams. Low salinity had profound effects on survival, energy metabolism and biomineralization of hard-shell clams and modulated their responses to elevated P<sub>CO<sub>2</sub></sub>. Negative effects of low salinity in juvenile clams were mostly due to the strongly elevated basal energy demand, indicating energy deficiency, that led to reduced growth, elevated mortality and impaired shell maintenance (evidenced by the extensive damage to the periostracum). The effects of elevated P<sub>CO<sub>2</sub></sub> on physiology and biomineralization of hard-shell clams were more complex. Elevated P<sub>CO<sub>2</sub></sub> (~800–1500 µatm) had no significant effects on standard metabolic rates (indicative of the basal energy demand), but affected growth and shell mechanical properties in juvenile clams. Moderate hypercapnia (~800 µatm P<sub>CO<sub>2</sub></sub>) increased shell and tissue growth and reduced mortality of juvenile clams in high salinity exposures; however, these effects were abolished under the low salinity conditions or at high P<sub>CO<sub>2</sub></sub> (~1500 µatm). Mechanical properties of the shell (measured as microhardness and fracture toughness of the shells) were negatively affected by elevated CO<sub>2</sub> alone or in combination with low salinity, which may have important implications for protection against predators or environmental stressors. Our data indicate that environmental salinity can strongly modulate responses to ocean acidification in hard-shell clams and thus should be taken into account when predicting the effects of ocean acidification on estuarine bivalves.

Supplementary material available online at <http://jeb.biologists.org/cgi/content/full/216/14/2607/DC1>

Key words: ocean acidification, salinity, estuary, standard metabolic rate, biomineralization, shell properties, mollusks.

Received 12 November 2012; Accepted 11 March 2013

### INTRODUCTION

Current models of global change predict a rise in the atmospheric carbon dioxide (CO<sub>2</sub>) levels from the current value of ~380–400 µatm to 730–1020 µatm by the year 2100 and 1500–2000 µatm in the next 300 years (Doney et al., 2009; Waldbusser et al., 2011). Approximately 30% of the anthropogenically released CO<sub>2</sub> is absorbed by the ocean, resulting in ocean acidification, which involves a drop in seawater pH, shifts in the inorganic carbon speciation and a decrease in saturation of calcium carbonate (CaCO<sub>3</sub>) minerals, and can strongly affect marine organisms (Kleypas et al., 2006; Pörtner, 2008; Przeslawski et al., 2008; Cooley and Doney, 2009). Estuarine and coastal habitats, the ocean's hotspots for biological diversity and productivity, may be especially vulnerable to ocean acidification. They often receive acidic inputs from freshwater and land run-off, upwelling of the CO<sub>2</sub>-enriched acidified waters as well as from biological CO<sub>2</sub> production, leading to large fluctuations in pH and carbonate chemistry (Mook and Koene, 1975; Cai and Wang, 1998; Thomsen et al., 2010;

Amaral et al., 2011). Moreover, the buffering capacity of estuarine waters is considerably lower than that of the open ocean (Mook and Koene, 1975; Cai and Wang, 1998). An increase in atmospheric CO<sub>2</sub> levels can exacerbate acidification of estuarine habitats, and long-term pH data show that some estuaries have become more acidic in the past 50 years, with the rate of acidification closely tracking atmospheric CO<sub>2</sub> (Najjar et al., 2010; Waldbusser et al., 2011).

Bivalve mollusks play a prominent ecological role as ecosystem engineers and key foundation species in estuarine and coastal ecosystems around the world (Gutiérrez et al., 2003; Kochmann et al., 2008). Mollusks belong to a broad group of marine organisms called marine calcifiers (i.e. organisms that build their skeleton from CaCO<sub>3</sub>) that are among the most sensitive groups of organisms to ocean acidification (Kleypas et al., 2006; Dupont et al., 2010; Kroeker et al., 2010). Ocean acidification strongly affects biomineralization of calcifiers due to the decrease in pH and saturation of CaCO<sub>3</sub> minerals, which slows deposition rates and

increases solubility of CaCO<sub>3</sub> (Gazeau et al., 2007; Byrne et al., 2011). The effects of elevated CO<sub>2</sub> on molluscan biomineralization can be very complex depending on the shell structure, mineralogy and biological factors involved in the control of shell formation (Addadi et al., 2006; Stanley, 2006; Ries et al., 2009; Kroeker et al., 2010). Elevated CO<sub>2</sub> levels can have systemic effects on the physiology of marine mollusks that extend beyond calcification, affecting their extracellular and intracellular pH, enzyme activity, protein stability and rates of energy metabolism (Pörtner, 2008; Lannig et al., 2010; Tomanek et al., 2011; Pörtner, 2012). These changes may directly affect the organism's performance and fitness as well as indirectly influence biomineralization *via* impacts on physiological functions such as activity of biomineralization enzymes and energy metabolism.

In estuaries, ocean acidification can be compounded by other environmental parameters (such as temperature, salinity and anthropogenic pollution) that can modulate the effects of elevated CO<sub>2</sub> (Lannig et al., 2010; Dickinson et al., 2012; Nikinmaa, 2013). Among these parameters, salinity is likely to play a key role due to its direct effect on seawater chemistry and buffering capacity as well as on the physiology of estuarine inhabitants. In osmoconforming animals, such as marine mollusks, reduced salinity has a strong impact on physiology, leading to changes in cell volume and extracellular and intracellular osmotic pressure, altering energy metabolism and enzyme activities, and affecting the rates of protein synthesis and turnover (Berger, 1986; Prosser, 1991; Berger and Kharazova, 1997). Earlier studies also showed that low salinity can exacerbate negative effects of elevated CO<sub>2</sub> levels on growth, energy balance and biomineralization of a common estuarine bivalve, the eastern oyster, *Crassostrea virginica* (Dickinson et al., 2012). However, the interactive effects of salinity and elevated CO<sub>2</sub> on marine organisms are not yet fully understood and require further investigation.

The aim of the present study was to characterize the interactive effects of two common environmental factors – elevated CO<sub>2</sub> and low salinity – on biomineralization, shell properties and energy metabolism of a common estuarine bivalve, the hard-shell clam *Mercenaria mercenaria* (Linnaeus 1758). *Mercenaria mercenaria* is an ecosystem engineer in temperate estuaries and coastal zones of the Atlantic affecting sediment structure and playing an important role in trophic interactions. Hard-shell clams are also economically important, with annual worldwide harvests ranging from 30,000 to 70,000 tons (Food and Agriculture Organization of the United Nations, Aquaculture and Fishery Statistics available at <http://www.fao.org>). Shells of hard-shell clams are made of aragonite, a more soluble polymorph of CaCO<sub>3</sub> than calcite, and consist of an outer thick prismatic layer and an inner cross-lamellar layer (Kraeuter and Castagna, 2001). This relatively simple shell mineralogy makes this clam a useful model species for studying the effects of ocean acidification and salinity on biomineralization and shell properties. We tested the hypothesis that low salinity (such as commonly occurs in the estuarine habitats of hard-shell clams) will exacerbate the effects of ocean acidification, resulting in reduced growth and biomineralization and elevated basal energy metabolism, which may decrease the amount of energy invested into growth and shell formation.

## MATERIALS AND METHODS

### Chemicals

Chemicals and enzymes were purchased from Sigma-Aldrich (St Louis, MO, USA), Roche (Indianapolis, IN, USA) or Fisher

Scientific (Pittsburg, PA, USA) unless otherwise stated, and were of analytical grade or higher.

### Experimental design

The effects of two factors, partial pressure of CO<sub>2</sub> ( $P_{CO_2}$ ) and salinity, were tested in a full factorial design. Three  $P_{CO_2}$  levels, ~395  $\mu$ atm (normocapnia, pH<sub>NBS</sub> 8.25–8.26), ~800  $\mu$ atm (moderate hypercapnia, pH<sub>NBS</sub> 8.15–8.16) and ~1500  $\mu$ atm (extreme hypercapnia, pH<sub>NBS</sub> 7.74–7.77), were assessed at a salinity of 32 (high salinity) or 16 (low salinity), yielding six treatment groups.  $P_{CO_2}$  levels were chosen to be representative of the present-day  $P_{CO_2}$  (~395  $\mu$ atm), atmospheric  $P_{CO_2}$  predicted by moderate IPCC scenarios for the year 2100 (~800  $\mu$ atm CO<sub>2</sub>) and a  $P_{CO_2}$  projection for the year 2250 (~1500  $\mu$ atm). The two selected salinity conditions were within the environmentally relevant range for *M. mercenaria*. Clams were randomly assigned to one of the six treatment groups and exposed for a total of 21 weeks. The group exposed to a salinity of 32 and ~395  $\mu$ atm  $P_{CO_2}$  was considered the control. Non-reproductive juveniles were used in this study in order to avoid complications due to the varying energy demands of reproducing organisms in different stages of their reproductive cycle. The salinity and CO<sub>2</sub> levels used in this study are within the range currently found in the estuaries of the southeastern USA where the clams were collected (Burnett, 1997; Ringwood and Keppler, 2002; McElhany and Busch, 2012). It is worth noting that clams can periodically experience much stronger acidification in their present-day habitats (with pH dropping below 7.0) than those used in the present study (Ringwood and Keppler, 2002); however, such extreme events usually only last from a few hours to a few days. The long-term exposures such as those used in the present study are more representative of the future ocean acidification scenarios.

### Animal collection and maintenance

Juvenile *M. mercenaria* (8 weeks post metamorphosis) were purchased from a commercial supplier (Grant's Oyster House, Sneads Ferry, NC, USA) and shipped overnight to the University of North Carolina at Charlotte. Clams were acclimated for 7 days in plastic trays (28×18×12 cm), each containing 5 l of artificial seawater (ASW; Instant Ocean, Kent Marine, Acworth, GA, USA) at 20±1°C and salinity of 32±1 bubbled with ambient air (normocapnia,  $P_{CO_2}$  ~395  $\mu$ atm). Animals were then randomly assigned to a high or low salinity treatment. Salinity was maintained at 32 for the high salinity group and was reduced gradually by three units per day until a salinity of 16 was reached.

Once the target salinity was reached, clams were further divided into groups assigned to different  $P_{CO_2}$  treatments. Target  $P_{CO_2}$  values were reached by bubbling seawater with gas mixtures containing different CO<sub>2</sub> concentrations. For normocapnic treatment, the tanks were bubbled with the ambient air. For moderate and extreme hypercapnia, ambient air was mixed with 100% CO<sub>2</sub> (Roberts Oxygen, Charlotte, NC, USA) in a fixed proportion using precision mass flow controllers (Cole-Parmer, Vernon Hills, IL, USA) and bubbled into the trays. The air-CO<sub>2</sub> mixture flow rate was set up to maintain the respective systems at a steady-state pH during the exposures. Two replicate trays were used for each species and treatment condition with ~400–500 animals per tray. Water temperature was maintained at 20±1°C throughout the duration of the experiment. Salinity and temperature was measured with an YSI30 salinity, temperature and conductivity meter (YSI, Yellow Springs, OH, USA). Salinity was determined on the practical salinity scale and is reported in practical salinity units (PSU). Water was changed every other day using ASW pre-equilibrated with the

respective gas mixtures. Animals were fed *ad libitum* on alternative days with 2 ml per tray of commercial algal mixture containing *Isochrysis* spp., *Pavlova* spp., *Thalassiosira weissflogii* and *Tetraselmis* spp. with 5–20 µm cells (Shellfish Diet 1800, Reed Mariculture, Campbell, CA, USA). Mortality was checked weekly.

### Seawater chemistry

Seawater chemistry parameters were determined in all experimental treatments (Table 1) as described elsewhere (Beniash et al., 2010). Water temperature, salinity and pH in the exposure trays was monitored throughout the course of the experiment, and water samples were collected periodically in air-tight containers, poisoned with mercuric chloride and stored at +4°C until further analysis. pH was measured using a pH electrode (pH meter Model 1671, Jenco Instruments, San Diego, CA, USA) calibrated with National Institute of Standards and Technology standard pH buffer solutions (National Bureau of Standards, NBS standards, Fisher Scientific). Total dissolved inorganic carbon (DIC) was measured by the Nutrient Analytical Services (Chesapeake Biological Laboratory, Solomons, MD, USA). Seawater carbonate chemistry parameters [ $P_{\text{CO}_2}$ , total alkalinity, and the saturation state ( $\Omega$ ) for calcite and aragonite] were calculated using CO2SYS software (Lewis and Wallace, 1998) using barometric pressure values, as well as DIC, pH, temperature and salinity values for the respective samples. For calculations, we used the NBS scale for seawater pH, constants from Millero et al. (Millero et al., 2006; from Lewis and Wallace, 1998), the  $\text{KSO}_4^-$  constant from Dickson (Dickson, 1990), and concentrations of silicate and phosphate for Instant Ocean seawater (silicate: 0.17 and 0.085 µmol kg<sup>-1</sup> at salinities of 32 and 16, respectively; phosphate: 0.04 and 0.02 µmol kg<sup>-1</sup> at salinities of 32 and 16, respectively).

### Shell mass and tissue mass

After 16 and 21 weeks exposure, a subset of clams from each treatment group was stored in 70% ethanol and shipped to the University of Pittsburgh for mass measurements, mechanical testing, and structural and mineralogical analyses. Upon receipt, clams were manually inspected and any clams with visible signs of shell damage were discarded.

For dry mass measurements, 11–40 animals (depending on availability) were randomly selected from each treatment group. Individual clams were dried in a vacuum oven at 45°C, 91 kPa for at least 15 days to achieve constant mass and weighed individually on a microbalance (Mettler-Toledo XP 26, Columbus, OH, USA) with precision of 0.01 mg or better. Once the total masses of individual clams were determined, each clam was incubated in 500 µl

sodium hypochlorite (NaOCl; commercial Clorox diluted to obtain 2% v/v NaOCl and filtered through a 0.2 µm filter) at room temperature (RT) for 10 days, with three changes of NaOCl solution to ensure complete removal of soft tissues. NaOCl-treated shells of individual clams were rinsed three times in deionized water, dried in air (24 h at RT) and a vacuum oven (24 h at 45°C), and weighed on a microbalance to obtain the shell mass. Tissue dry mass was determined as the difference between the total dry mass of the clam and the dry mass of the shell.

### Mechanical properties of the shells

Mechanical properties, structure and mineralogy of the shells were analyzed in the whole shells of experimental clams (i.e. including new growth and pre-existing shell) because the region of new shell growth was too small for the analyses. Therefore, results of these analyses should be interpreted as encompassing both the newly deposited shell material and changes in the existing shell due to the differences in the seawater chemistry.

Micromechanical testing was conducted on left valves of the NaOCl-treated shells of clams that had been exposed to experimental conditions for 21 weeks. For each treatment group, seven shells were tested. Clams were selected for analysis that approximated the mean mass of all clams when all treatments were combined (3.06 mg). Left shell valves were mounted in epoxy resin (Epofix, EMS, Hatfield, PA, USA) in a flat silicone embedding mold (EMS) and polymerized for 24 h at RT. Embedded shells were cut longitudinally, transecting the anterior apical tip to the most posterior distal edge using a slow-speed water-cooled diamond saw (IsoMet, Buehler, Lake Bluff, IL, USA). A second cut was made parallel to the first one to produce a 3 mm thick section, as described previously (Dickinson et al., 2012). Sections were ground and polished with Metadi diamond suspensions at 6, 1 and 0.25 µm particle size on a grinder-polisher (MiniMet 1000, Buehler). Grinding and polishing was conducted using a saturated CaCO<sub>3</sub> solution (pH 8.1) prepared by mixing calcium and carbonate salts at very high concentrations and letting the mineral precipitate over several hours. The mixture was centrifuged and the supernatant was used to polish the samples. No etching of the shell samples was observed during grinding or polishing.

Vickers microhardness tests were conducted using a microindentation hardness tester (IndentaMet 1104, Buehler) on polished shells at 0.245 N load and 5 s dwelling time. Indents were made within the middle layer of the shell (cross-lamellar homogenous layer) in a region equidistant from the apical anterior tip and the most distal posterior edge. Five to seven indentations

Table 1. Summary of water chemistry parameters during experimental exposures

|                                                                | Exposure salinity |              |              |              |              |               |
|----------------------------------------------------------------|-------------------|--------------|--------------|--------------|--------------|---------------|
|                                                                | 16                |              |              | 32           |              |               |
|                                                                | ~395 µatm         | ~800 µatm    | ~1500 µatm   | ~395 µatm    | ~800 µatm    | ~1500 µatm    |
| pH                                                             | 8.25±0.26         | 8.16±0.14    | 7.77±0.11    | 8.26±0.08    | 8.15±0.10    | 7.74±0.18     |
| Temperature (°C)                                               | 19.3±1.6          | 20.4±0.9     | 19.7±0.8     | 20.1±1.0     | 20.8±0.8     | 20.4±0.6      |
| Salinity                                                       | 17.0±1.0          | 16.3±0.9     | 16.5±0.8     | 32.7±1.6     | 31.6±1.1     | 31.5±1.0      |
| $P_{\text{CO}_2}$ (µatm)                                       | 289.1±30.2        | 704.5±263.5  | 1277.2±235.2 | 385.1±103.6  | 656.6±212.7  | 1712.6±346.9  |
| Total alkalinity (µmol kg <sup>-1</sup> seawater)              | 1564.9±86.8       | 1502.0±56.46 | 1518.4±82.69 | 3025.7±178.5 | 2944.6±113.4 | 2913.9±106.38 |
| CO <sub>3</sub> <sup>2-</sup> (µmol kg <sup>-1</sup> seawater) | 94.2±11.2         | 47.11±19.27  | 25.9±6.0     | 306.4±41.2   | 206.9±37.0   | 91.9±15.3     |
| $\Omega_{\text{Ca}}$                                           | 2.56±0.29         | 1.29±0.52    | 0.71±0.16    | 7.46±1.01    | 5.07±0.90    | 2.26±0.37     |
| $\Omega_{\text{Arg}}$                                          | 1.54±0.18         | 0.77±0.32    | 0.42±0.10    | 4.83±0.65    | 3.28±0.58    | 1.46±0.24     |

Salinity, temperature, pH and total alkalinity were determined in samples from experimental tanks as described in the Materials and methods. Other parameters were calculated using CO2SYS software. Data are presented as means ± s.d.  $N=45-51$  for temperature, salinity and pH, and  $N=5-8$  for all other parameters.

per shell were made at least 30  $\mu\text{m}$  away from the shell edges and from other indents. Vickers hardness numbers (VHN) were averaged for each shell sample. Digital photographs were taken before and immediately after each indentation. This enabled quantification of the longest crack produced by each indent, which was measured using Photoshop (version 4.0, Adobe, San Jose, CA, USA) as the radius of a circle radiating from the center of the indent enclosing all visible cracks. The crack radius ( $\mu\text{m}$ ) for a shell sample was obtained by averaging the crack radii for all indents on that sample.

Hardness and crack radius measurements were used to calculate fracture toughness ( $K_c$ ) for each sample as described elsewhere (Anstis et al., 1981; Baldassarri et al., 2008):

$$K_c = 0.0154(E/H)^{1/2} \times (P/C^{1.5}), \quad (1)$$

where 0.0154 is a calibration constant,  $E$  is the elastic modulus [empirically determined for *M. mercenaria* as 66 GPa (Currey and Taylor, 1974)],  $H$  is hardness in GPa,  $P$  is applied load in N and  $C$  is crack radius in  $\mu\text{m}$ .

### Shell structure

Scanning electron microscopy (SEM) imaging was conducted on the exterior and interior of the shells collected after 16 weeks of exposure. Imaging of the exterior was conducted on shells that had not been exposed to NaOCl (to avoid destruction of the periostracum), whereas imaging of the interior surface was conducted on NaOCl-treated shells. Right shell valves were affixed to an SEM stub using a copper tape and conductive paint, and sputter-coated with gold/palladium. Imaging was conducted in the secondary electron imaging mode using a field emission SEM (JSM-6330F, Jeol, Peabody, MA, USA) at 3 kV and 7–8.2 mm working distance. Micrographs of the shell exteriors were taken at  $\times 35$  and  $\times 2500$  magnifications (for the whole shell and the peripheral growth ridge, respectively), and interior images were taken within a central region of the shell interior at  $\times 1500$  to  $\times 15,000$  magnifications. Six shells (three each for the interior and exterior surfaces) were imaged for each treatment group.

### Shell mineralogy

The right valves of clam shells collected after 21 weeks of experimental exposures and treated with NaOCl were ground with a mortar and pestle, pressed into a KBr pellet, and analyzed in transmittance mode on a Fourier Transform Infrared (FTIR) spectrometer (Bruker Optics, Vertex 70 FTIR, Billerica, MA, USA). Spectra were acquired at 4 wavenumber resolution, with 32 scans for two shells per experimental group. The 600–2000  $\text{cm}^{-1}$  region of the spectra were isolated, baseline corrected and normalized, and the  $\nu_2$ ,  $\nu_3$  and  $\nu_4$  peak positions and heights were measured using Spectrum 5.1 software (Perkin-Elmer, Santa Clara, CA, USA). Relative crystallinity was determined based on  $\nu_2:\nu_3$  and  $\nu_2:\nu_4$  ratios (Beniash et al., 1997; Gueta et al., 2007).

### Standard metabolic rate

Standard metabolic rate (SMR) was determined as the resting oxygen consumption rate ( $\dot{M}_{\text{O}_2}$ ) in juvenile clams after 2, 8, 11 and 21 weeks of experimental exposures.  $\dot{M}_{\text{O}_2}$  was measured using Clarke-type oxygen electrodes (Qubit Systems, Kingston, ON, Canada) in a water-jacketed respiratory chamber (OX1LP-4ml, Qubit Systems) at 20°C in ASW at the same  $P_{\text{CO}_2}$  and salinity as used in experimental exposures. Two-point calibration with air-saturated seawater and saturated  $\text{Na}_2\text{SO}_3$  solution was conducted prior to each measurement at the respective salinity and  $P_{\text{CO}_2}$ . The respirometry chamber was equipped with an adjustable air-tight plunger that

allowed maintenance of a constant volume of water (2 ml) regardless of the volume of the experimental animals; therefore, no correction for the volume displacement by clams was needed. To avoid interference with post-prandial metabolism and feces excretion, juveniles were fasted for 24 h prior to the start of  $\dot{M}_{\text{O}_2}$  recordings. For each measurement, three to five similarly sized individuals were selected, placed in the chamber, and allowed to recover from handling stress for 45 min. The chambers were closed and  $\dot{M}_{\text{O}_2}$  was measured as a decrease in  $\text{O}_2$  concentration for 30 min. Oxygen levels during the measurement period were never less than 80% of air saturation. Two technical replicates, with 15 min recovery period between the recordings, were obtained for each measurement and these two measurements were averaged. After each experiment, the electrode drift was determined by measuring the oxygen consumption for 15 min in the chamber with 2 ml of seawater without the clams. These values were used to correct the oxygen consumption rates of the experimental clams. A total of 10 biological replicates were obtained for each treatment group, each replicate representing SMR of a separate group of three to five clams. After measurements, total tissue dry mass was determined for all juveniles in the group as described above in ‘Shell mass and tissue mass’. SMR was calculated as follows:

$$\text{SMR} = \frac{\Delta P_{\text{O}_2} \times \beta_{\text{O}_2} \times V}{M_{\text{tot}}} \times \left( \frac{M_{\text{ind}}}{M_{\text{av}}} \right)^{-0.2}, \quad (2)$$

where SMR is the normalized oxygen consumption ( $\mu\text{mol O}_2 \text{ g}^{-1} \text{ dry mass h}^{-1}$ ),  $\Delta P_{\text{O}_2}$  is the decrease in partial oxygen pressure in the respirometry chamber over time ( $\text{kPa h}^{-1}$ ),  $V$  is water volume in the chamber (l),  $\beta_{\text{O}_2}$  is the oxygen capacity of water ( $\mu\text{mol O}_2 \text{ l}^{-1} \text{ kPa}^{-1}$ ),  $M_{\text{tot}}$  is the total dry tissue mass of all juveniles in the respirometry chamber (g),  $M_{\text{ind}}$  is the average individual dry tissue mass of juveniles in the respirometry chamber (mg),  $M_{\text{av}}$  is the average individual dry tissue mass of juveniles across all experimental treatments (0.237 mg) and  $-0.2$  is an allometric coefficient (Lannig et al., 2006).

### Statistical analysis

Experimental data sets were tested for the presence of potential outliers using Grubbs’ test (extreme studentized deviate method) as implemented in GraphPad Prism version 5.03 (GraphPad Software, La Jolla, CA, USA). A small number of statistically significant outliers were detected and removed from the analysis; the outlier occurrence was random among the treatment groups. Regression analyses were performed to determine the relationship between shell or tissue mass and aragonite saturation level. Linear, exponential and quadratic curves were fit to the data, and the best-fit curves were chosen based on the significance of the fit and the percentage of variation explained by the regression line estimated by  $R^2$ . Average monthly mortalities were estimated from the weekly mortality counts in different treatment groups and compared among treatments using Fisher’s exact test. The effects of the factors  $P_{\text{CO}_2}$  and salinity and their interaction on shell mechanical properties and SMR were tested using a generalized linear model (GLM) ANOVA after testing for the normality of data distribution and homogeneity of variances. Both factors were treated as fixed, and  $P_{\text{CO}_2}$  had three levels ( $\sim 395$ , 800 and 1500  $\mu\text{atm}$ ) while salinity had two levels (32 and 16). *Post hoc* tests (Fisher’s least significant difference) were used to test the differences between the group means; only planned contrasts were used. Pearson correlation ( $R$ ) and principal component analyses (PCA) were conducted using Origin 8.6 software (OriginLab, Northampton, MA, USA). Pearson correlation analysis

for individual shell mass ( $M_{sh}$ ) versus tissue mass ( $M_{ti}$ ) was conducted for each experimental group at 16 and 21 week time points. Furthermore, Pearson correlation and PCA analyses were conducted across all experimental groups and time points; for this analysis we used average values of SMR,  $M_{sh}$ ,  $M_{ti}$  and mortality for each treatment group at the respective time point with exposure time, salinity,  $P_{CO_2}$  and the degree of aragonite saturation ( $\Omega_{Arg}$ ) as the potential explanatory variables.

Sample sizes for all experimental groups were 360–505 for mortality estimates and 6–40 for all other traits. Each replicate represents a sample from an individual clam, except SMR, where each biological replicate represents a group of three to five juveniles. Unless otherwise indicated, data are presented as means  $\pm$  s.e.m. The differences were considered significant if the probability of Type I error was less than 0.05.

## RESULTS

### Seawater chemistry

Aragonite saturation state decreased with increasing  $P_{CO_2}$  and with decreasing salinity (Table 1). An increase in  $P_{CO_2}$  from  $\sim 395$  to  $\sim 1500$   $\mu\text{atm}$  resulted in a reduction in  $\Omega_{Arg}$  from  $\Omega=4.83$  to 1.46, and a similar decrease of  $\Omega_{Arg}$  (to 1.54) was seen when salinity was reduced from 32 to 16 under the current  $P_{CO_2}$  conditions ( $\sim 395$   $\mu\text{atm}$ ). At the low salinity (16), two experimental  $P_{CO_2}$  treatments ( $\sim 800$  and  $1500$   $\mu\text{atm}$ ) resulted in undersaturation of the seawater for aragonite ( $\Omega_{Arg}=0.77$ – $0.42$ ). In all other experimental treatments,  $\Omega_{Arg}$  values were above the saturation threshold for aragonite (Table 1).

### Mortality

Juvenile clams exhibited significantly higher mortality in low salinities (Fisher's exact test:  $P<0.05$  for 8–20 weeks of exposure; Fig. 1A). In the high salinity groups  $P_{CO_2}$  had no effect on mortality of juvenile clams during the first 12 weeks of exposure. After 16 weeks of exposure at salinity 32, mortality of juveniles was significantly lower at  $\sim 800$   $\mu\text{atm}$   $P_{CO_2}$  ( $<2\%$ ) than at  $\sim 1500$  ( $\sim 3$ – $7\%$ ) or  $\sim 395$   $\mu\text{atm}$   $P_{CO_2}$  (13–26%;  $P<0.05$  among all  $P_{CO_2}$  groups). Mortality was also lower in clams exposed for 20 weeks to  $\sim 1500$   $\mu\text{atm}$   $P_{CO_2}$  at salinity 32 compared with their normocapnic counterparts ( $P<0.05$ ); no mortality data are available for this time point for clams kept at  $\sim 800$   $\mu\text{atm}$   $P_{CO_2}$ . At salinity 16, the highest mortality was observed in juveniles exposed to extreme hypercapnia ( $\sim 1500$   $\mu\text{atm}$   $P_{CO_2}$ ) after 8–20 weeks of exposure ( $P<0.05$  for contrasts between extreme hypercapnia and the other two  $P_{CO_2}$  treatments; Fig. 1A). Mortality of juveniles exposed to moderate hypercapnia ( $\sim 800$   $\mu\text{atm}$   $P_{CO_2}$ ) and salinity 16 was slightly but significantly lower than in the normocapnic low salinity group after 8–12 weeks of exposure ( $P<0.05$ ) but not after prolonged (16–20 weeks) exposure ( $P>0.05$ ).

### Standard metabolic rate

SMR of clams was significantly affected by the interaction of  $P_{CO_2}$  and salinity, indicating that metabolic response to  $P_{CO_2}$  was modulated by the acclimation salinity (Table 2). At high salinity,  $P_{CO_2}$  had no significant effect on SMR (Fig. 1B). At all  $P_{CO_2}$  levels, there was a slight but significant increase in SMR after 8 weeks of exposure, which quickly returned back to the initial levels in all high salinity treatments. In contrast, in low salinity groups, there was an initial depression of SMR after 2 weeks of exposure followed by a dramatic increase (8- to 10-fold) after 8–11 weeks of exposure (Fig. 1B). SMR peaked at different exposure times in juveniles exposed to different  $P_{CO_2}$ ; the maximum SMR was reached earlier

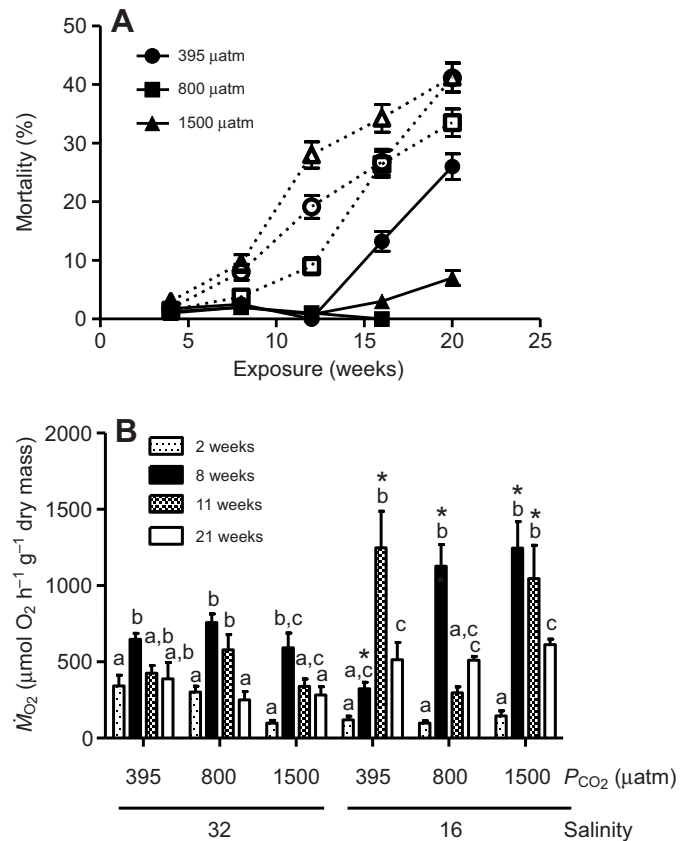

Fig. 1. Mortality and standard metabolic rate (SMR) in juvenile clams (*Mercenaria mercenaria*) exposed to different  $P_{CO_2}$  and salinity treatments. (A) Mortality over 20 weeks of exposure period. Solid symbols and solid lines, salinity 32; open symbols and broken lines, salinity 16. Circles, squares and triangles correspond to exposure  $P_{CO_2}$  of  $\sim 395$ , 800 and 1500  $\mu\text{atm}$ , respectively. There are no mortality estimates for juveniles exposed to  $\sim 800$   $\mu\text{atm}$   $P_{CO_2}$ , salinity 32, due to an accidental loss of experimental animals.  $N=360$ – $505$ . (B) SMR measured as mass-specific oxygen consumption rates standardized to the average mass of experimental clams ( $0.237$  mg dry tissue mass). Different letters denote significant differences between exposure periods within the same experimental condition ( $P<0.05$ ). Asterisks denote the values that are significantly different from the respective values for the control clams (maintained at  $\sim 395$   $\mu\text{atm}$   $P_{CO_2}$  and salinity 32) for the same duration of time ( $P<0.05$ ). Error bars represent s.e.m.  $N=9$ – $10$ .

in hypercapnic groups (after 8 weeks of exposure) than in the normocapnic group (after 11 weeks). After 21 weeks at low salinity, SMR had decreased in all  $P_{CO_2}$  treatment groups but remained significantly elevated above the initial levels measured after 2 weeks of low salinity exposures (Fig. 1B).

### Shell and tissue mass

In clams exposed to moderately elevated  $P_{CO_2}$  (800  $\mu\text{atm}$ ) at high salinity, the shell masses ( $M_{sh}$ ) were significantly higher than in the control after 16 and 21 weeks of exposure, while no difference was observed between the control (395  $\mu\text{atm}$ ) and extreme  $P_{CO_2}$  (1500  $\mu\text{atm}$ ) groups maintained at high salinity (Fig. 2). At low salinity,  $M_{sh}$  values were significantly lower in all  $P_{CO_2}$  treatment groups compared to their high salinity counterparts. Soft tissue mass ( $M_{ti}$ ) determined after 16 weeks of exposure was also significantly lower in clams exposed to low salinity compared with their high salinity counterparts (Fig. 2). In high salinity treatments, clams

Table 2. Effects of exposure  $P_{CO_2}$ , salinity and their interaction on shell and physiological properties in juvenile *Mercenaria mercenaria*

| Parameter               | $P_{CO_2}$                | Salinity                    | $P_{CO_2} \times$ Salinity  |
|-------------------------|---------------------------|-----------------------------|-----------------------------|
| Shell mass, 16 weeks    | $F_{2,119}=37.8, P<0.001$ | $F_{1,119}=8.00, P<0.001$   | $F_{2,119}=0.68, P=0.507$   |
| Shell mass, 21 weeks    | $F_{2,163}=11.2, P=0.001$ | $F_{1,163}=3.30, P=0.039$   | $F_{2,163}=13.2, P<0.001$   |
| Tissue mass, 16 weeks   | $F_{2,117}=0.42, P=0.653$ | $F_{1,117}=63.4, P<0.001$   | $F_{2,117}=1.44, P=0.242$   |
| Tissue mass, 21 weeks   | $F_{2,147}=2.41, P=0.093$ | $F_{1,147}=51.8, P<0.001$   | $F_{2,147}=53.9, P<0.001$   |
| Vickers microhardness   | $F_{2,36}=6.16, P=0.005$  | $F_{1,36}=2.86, P=0.099$    | $F_{2,36}=0.77, P=0.472$    |
| Fracture toughness      | $F_{2,33}=0.92, P=0.408$  | $F_{1,33}=4.00, P=0.054$    | $F_{2,33}=3.75, P=0.034$    |
| Standard metabolic rate | $F_{2,427}=0.36, P=0.701$ | $F_{1,427}=37.19, P<0.0001$ | $F_{2,427}=12.93, P<0.0001$ |

F-values are provided with degrees of freedom for the factor and the error in subscript. Significant P-values are in bold.

exposed to hypercapnia tended to have higher tissue mass compared with their normocapnic counterparts, but this trend was only significant after 21 weeks of exposure (Fig. 2B). At low salinity, the trend was reversed, and hypercapnic groups tended to have lower tissue mass compared with their normocapnic counterparts; this trend was likewise significant only after 21 weeks of exposure (Fig. 2B). Analysis of the effects of  $\Omega_{Arg}$  on shell and soft tissue mass after 16 and 21 weeks of exposure revealed a non-linear biphasic relationship between  $\Omega_{Arg}$  and  $M_{Ti}$  or  $M_{Sh}$  ( $P<0.001, R^2=0.16-0.42$  for all regressions; Fig. 2). Shell and tissue mass were the highest

at  $\Omega_{Arg}=3.3$ , which corresponds to the group exposed to moderate hypercapnia (~800  $\mu\text{atm } P_{CO_2}$ ) at high salinity. Shell and tissue masses were reduced above and below this  $\Omega_{Arg}$  and were the lowest at  $\Omega_{Arg}<1$  (Fig. 2). To better understand the relationships between  $M_{Ti}$  and  $M_{Sh}$  we conducted Pearson correlation tests within each experimental treatment group. Overall, in high salinity groups the correlations between  $M_{Ti}$  and  $M_{Sh}$  were much stronger and highly significant compared with the low salinity treatments (supplementary material Table S1). The only exception was the control group (normocapnia at salinity 32), where no correlation between  $M_{Ti}$  and

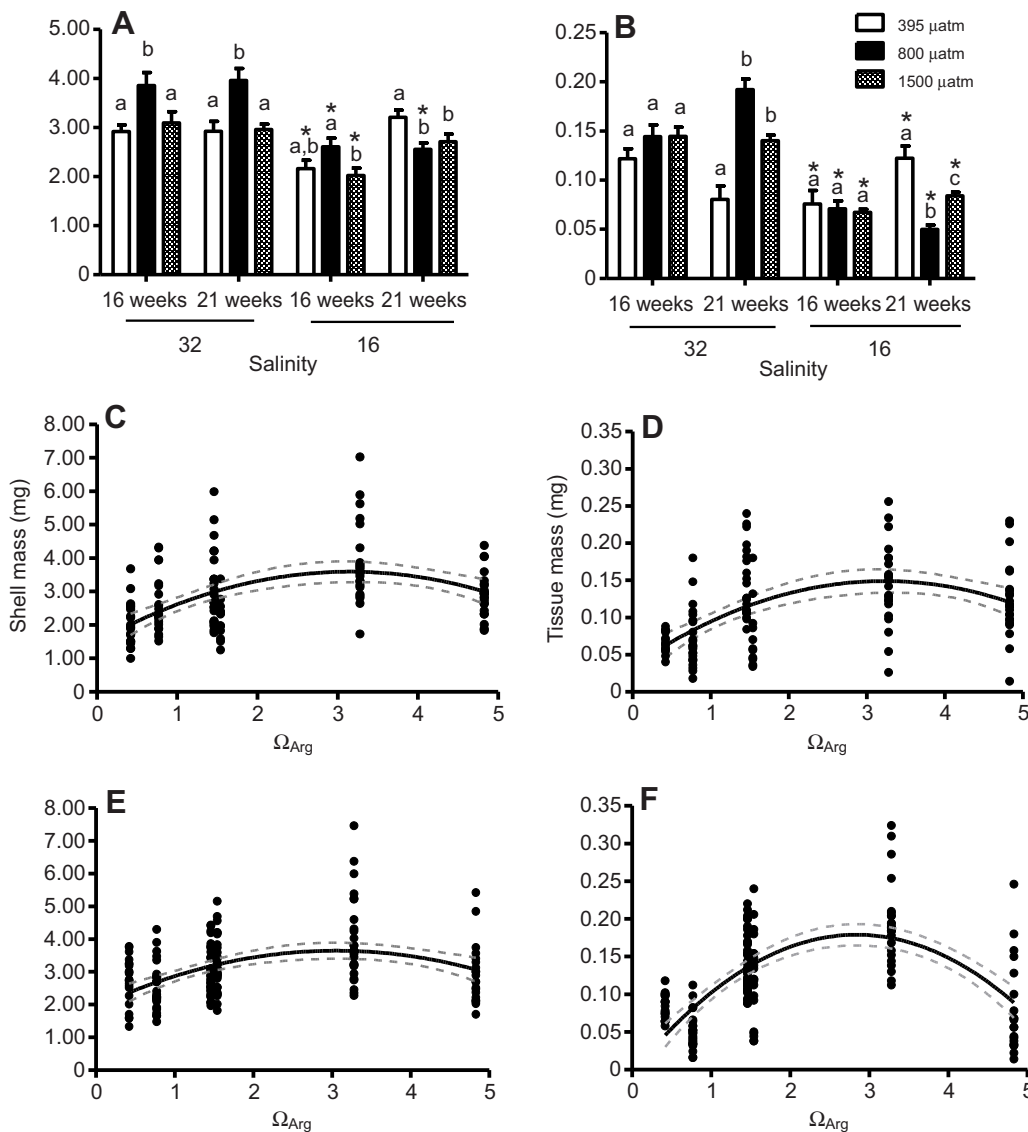

Fig. 2. Changes in *M. mercenaria* shell and tissue mass in response to salinity,  $P_{CO_2}$  and aragonite saturation ( $\Omega_{Arg}$ ). (A) Average shell mass after 16 and 21 weeks of exposure; (B) average tissue mass after 16 and 21 weeks of exposure. Different letters denote significant differences between different  $P_{CO_2}$  levels at the same salinity and exposure period ( $P<0.05$ ). \*Significant differences between high and low salinity at the same  $P_{CO_2}$  levels and exposure period ( $P<0.05$ ). (C, E) Regressions of shell mass versus aragonite saturation levels after 16 and 21 weeks of exposure, respectively; (D, F) regressions of tissue mass versus aragonite saturation levels after 16 and 21 weeks of exposure, respectively. Polynomial regressions (solid lines) and 95% confidence intervals (broken lines) are given.  $N=11-40$  in each experimental group.

$M_{sh}$  was found after 21 weeks of exposure (supplementary material Table S1). This may be due to the fact that this group experienced high accidental mortality between 16 and 21 weeks of exposure, and the lack of correlation might be related to the survivor effect.

### Mechanical properties and mineralogy of the shells

Vickers microhardness tested on the shells of clams exposed to different  $P_{CO_2}$  and salinity conditions for 21 weeks was significantly affected by  $P_{CO_2}$  but not by salinity (Table 2, Fig. 3). At high salinity, shell microhardness was significantly reduced in clams exposed to ~800 and ~1500  $\mu\text{atm } P_{CO_2}$ . At low salinity, only the group exposed to ~1500  $\mu\text{atm}$  was significantly different with respect to the shell microhardness from the respective normocapnic counterparts. Microhardness did not differ between high and low salinity treatments when groups exposed to the same  $P_{CO_2}$  levels were compared ( $P > 0.05$ ).

Fracture toughness was significantly affected by the interaction of  $P_{CO_2}$  and salinity, indicating that the effects of elevated  $P_{CO_2}$  on this trait are modulated by the exposure salinity (Table 2). At high salinity, fracture toughness of the shells was significantly reduced in clams exposed to ~1500  $\mu\text{atm } P_{CO_2}$  (Fig. 3). The fracture toughness of the shells of clams exposed to ~800  $\mu\text{atm } P_{CO_2}$  at high salinity did not differ from the normocapnic controls, despite a significantly lower hardness in the former group (Fig. 3). Shell fracture toughness was generally lower in the clams maintained at low salinity in

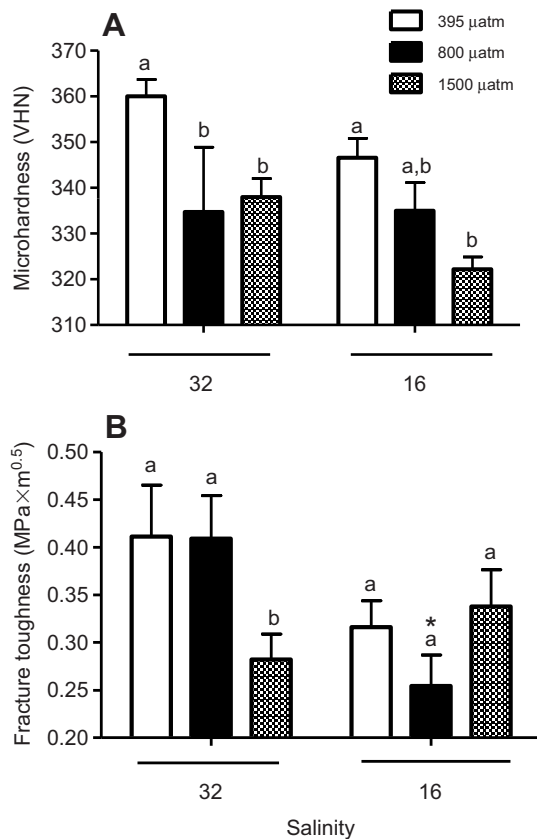

Fig. 3. Mechanical properties of the shells of *M. mercenaria* exposed to different  $P_{CO_2}$  and salinity levels. (A) Vickers microhardness of clam shells exposed to experimental conditions for 21 weeks. (B) Fracture toughness of clam shells exposed to experimental conditions for 21 weeks. Within each salinity treatment, groups marked with different letters are significantly different ( $P < 0.05$ ). \*Significant difference between high and low salinity groups at same  $P_{CO_2}$ . Data are presented as means  $\pm$  s.e.m.  $N = 6-7$ .

normocapnia and moderate hypercapnia (~395 and ~800  $\mu\text{atm } P_{CO_2}$ ) compared with their counterparts from the high salinity treatments, although the decrease was only significant at ~800  $\mu\text{atm } P_{CO_2}$  (Fig. 3). Interestingly, the fracture toughness values were higher in the 1500  $\mu\text{atm } P_{CO_2}$ , 16 salinity group than in the 800  $\mu\text{atm } P_{CO_2}$ , 16 salinity group. We attribute this increase to higher porosity due to shell dissolution. The cracks generated by the indenter tip can be arrested or deflected by pores, although this porosity may or may not add to the materials strength, depending on other factors (Shigegaki et al., 1997; Xu et al., 2001).

FTIR spectra collected from the shells of clams exposed to different  $P_{CO_2}$  and salinity regimes for 21 weeks showed that shells were comprised of aragonite with no other mineral forms present (supplementary material Fig. S1). Analysis of  $\nu_2$  and  $\nu_4$  peak position and absorption intensity relative to the  $\nu_4$  peak revealed no differences among treatment groups, indicating that no changes in crystallinity had occurred in response to experimental treatments (data not shown).

### Shell structure

SEM imaging of the exterior (Fig. 4) and interior (Fig. 5) of the shells of clams exposed to different  $P_{CO_2}$  and salinity conditions revealed distinct differences in shell structure among treatment groups. In high salinity exposures where  $\Omega_{Arg}$  remained above the saturation level, only minor differences in the structure of shell exterior were observed (Fig. 4A–C). Pronounced growth ridges were found in clam shells from high salinity treatments regardless of the exposure  $P_{CO_2}$  (Fig. 4C, inset). At low salinity, distinct flaking of the periostracum was observed at all levels of  $P_{CO_2}$ , with a nearly complete loss of periostracum at ~1500  $\mu\text{atm } P_{CO_2}$  (Fig. 4D–F). Major erosion and pitting of the underlying mineral were also observed at low salinity in shells of the clams exposed to ~800 and 1500  $\mu\text{atm } P_{CO_2}$ , where  $\Omega_{Arg}$  was  $< 1$ . Growth ridges were less pronounced in the shells of clams maintained at low salinity, and at ~1500  $\mu\text{atm } P_{CO_2}$  and salinity 16 they were barely visible (Fig. 4D–F, inset). These results demonstrate that the exposed regions of the shells are susceptible to chemical erosion in undersaturated environments.

In contrast, changes in structure of the interior of the shells did not vary directly with experimental  $\Omega_{Arg}$  levels. Under the control conditions (salinity 32, ~395  $\mu\text{atm } P_{CO_2}$ ), the interior of clam shells was composed of closely interlocking aragonite crystals (Fig. 5A). In all other experimental treatments, a distinct etching of aragonite was observed, resulting in a porous interior (Fig. 5). This etching was the most extreme in shells of the clams exposed to ~1500  $\mu\text{atm } P_{CO_2}$  at low salinity (Fig. 5F). Clams exposed to ~1500  $\mu\text{atm } P_{CO_2}$  at low salinity also showed substantial degradation and etching of the hinge region, which was not observed for other treatment groups (Fig. 6).

### Correlation analysis

Correlation analysis revealed a number of significant associations between the studied parameters ( $P < 0.05$ ). As expected,  $\Omega_{Arg}$  of the seawater was strongly correlated with salinity ( $R = 0.73$ ) and  $P_{CO_2}$  ( $R = -0.59$ ) (supplementary material Table S2). Shell mass ( $M_{sh}$ ) and soft tissue mass ( $M_{ti}$ ) were significantly positively correlated with salinity ( $R = 0.64$  and  $0.50$ , respectively) and with each other ( $R = 0.62$ ). Shell mass was also positively correlated with  $\Omega_{Arg}$  ( $R = 0.39$ ). Mortality had a strong positive correlation with exposure time ( $R = 0.67$ ) and a negative correlation with salinity ( $R = -0.51$ ),  $M_{ti}$  ( $R = -0.61$ ) and  $M_{sh}$  ( $R = -0.39$ ). These data indicate that changes in water chemistry had a direct effect on tissue and shell growth as well as mortality in clams, with salinity having the most profound effect.

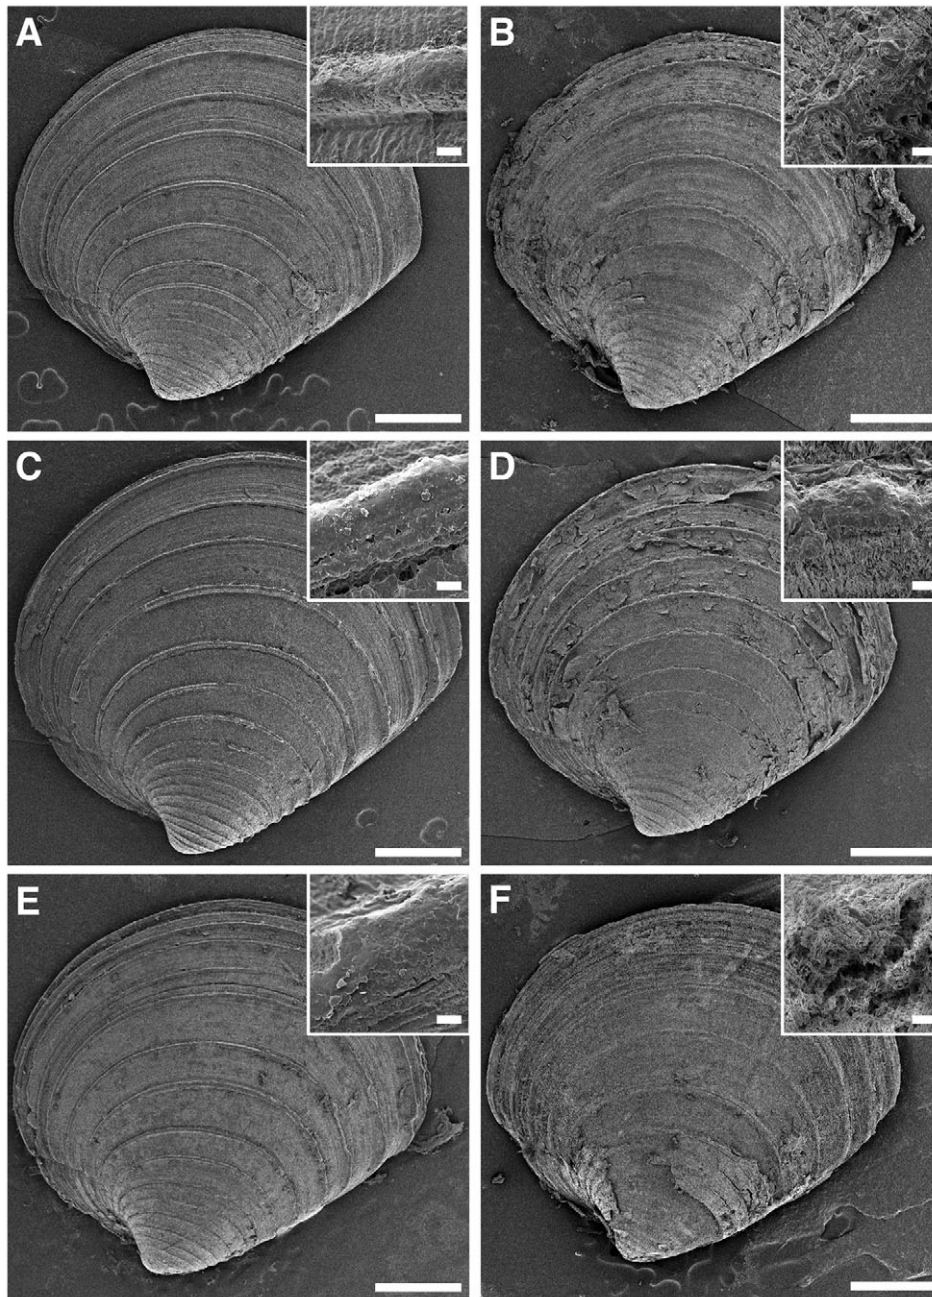

Fig. 4. SEM micrographs of the exterior of *M. mercenaria* shells after 16 weeks exposure to experimental conditions. The inset on each panel is a high magnification image of a growth ridge near the periphery of the shell. (A) 395  $\mu$ atm, salinity 32; (B) 395  $\mu$ atm, salinity 16; (C) 800  $\mu$ atm, salinity 32; (D) 800  $\mu$ atm, salinity 16; (E) 1500  $\mu$ atm, salinity 32; (F) 1500  $\mu$ atm, salinity 16. Scale bars, 500  $\mu$ m main panels; 5  $\mu$ m insets.

We have tested for the possible associations between the studied parameters separately within high and low salinity groups. In the high salinity group, the only significant correlation was found between  $M_{ti}$  and  $M_{sh}$  ( $R=0.69$ ; supplementary material TableS3). In contrast, in the low salinity group a strong negative correlation was observed between  $P_{CO_2}$  and  $M_{sh}$  ( $R=-0.55$ ) and an equally strong positive correlation was observed between  $\Omega_{Arg}$  and  $M_{sh}$  ( $R=0.54$ ), while no significant correlations were found between the water chemistry parameters and  $M_{ti}$  (supplementary material TableS4). Interestingly, exposure time was negatively correlated with  $M_{ti}$  ( $R=-0.54$ ), indicating selective mortality and/or tissue loss in juvenile clams during prolonged exposure at low salinity.

#### Principal component analysis

PCA revealed that salinity and  $\Omega_{Arg}$  had the highest loadings on the first principal component (PC1), responsible for 38% of data

variance (supplementary material TableS5). PC2, accounting for another 25% of variance, was dominated by  $P_{CO_2}$  and pH, while PC3 (15% of the variance) was predominantly associated with the experimental exposure time. Notably, PC4, accounting for 10% of the variance, was dominated by SMR (a loading of 0.92); all other loadings in PC4 were very low except  $M_{ti}$  (a loading of 0.31). Together, the first three principal components (PC1, PC2 and PC3) accounted for almost 80% of the data variance. On the PCA plots, mortality and SMR grouped together in the plane formed by PC1 and PC2, consistent with the concomitant increase of SMR and mortality with decreasing salinity. There was also a strong positive relationship between salinity and shell and tissue masses. Interestingly, analysis of PC2 reveals that  $M_{ti}$  and  $M_{sh}$  are positively influenced by  $P_{CO_2}$ , probably reflecting the fact that at moderately elevated  $P_{CO_2}$  conditions,  $M_{ti}$  and  $M_{sh}$  values are generally higher than in normocapnia.



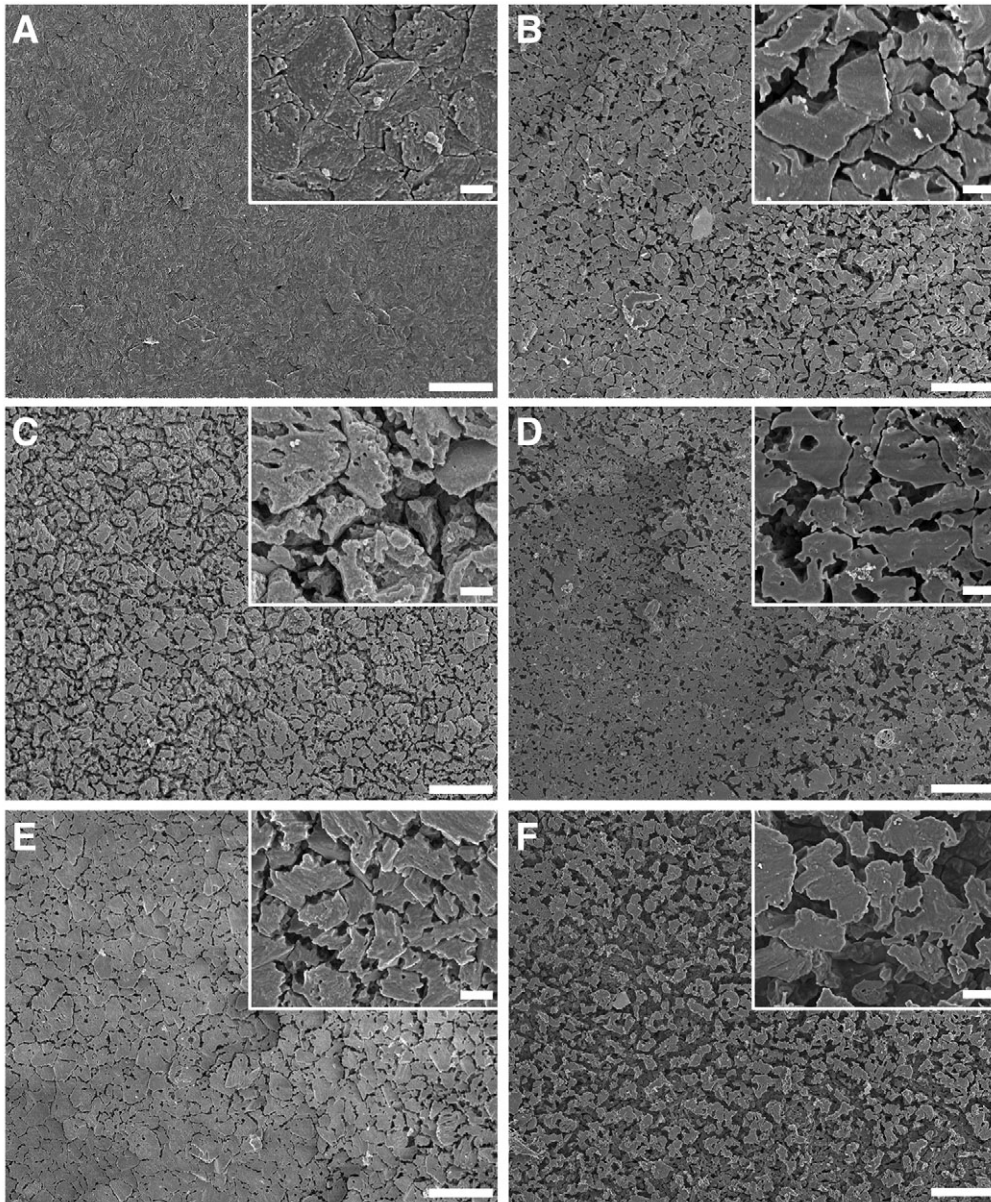

Fig. 5. SEM micrographs of the interior of *M. mercenaria* shells after 16 weeks exposure to experimental conditions. Images were taken within the center region of the shell interior. Higher (inset) and lower (outer) magnification images were taken from the same region. (A) 395  $\mu\text{atm}$ , salinity 32; (B) 395  $\mu\text{atm}$ , salinity 16; (C) 800  $\mu\text{atm}$ , salinity 32; (D) 800  $\mu\text{atm}$ , salinity 16; (E) 1500  $\mu\text{atm}$ , salinity 32; (F) 1500  $\mu\text{atm}$ , salinity 16. Scale bars, 100  $\mu\text{m}$  main panels; 1  $\mu\text{m}$  insets.

To eliminate possible artifacts due to the fact that pH and  $\Omega_{\text{Arg}}$  strongly depend on salinity and  $P_{\text{CO}_2}$ , we conducted PCA using only salinity,  $P_{\text{CO}_2}$  and time of exposure as potential explanatory variables (supplementary material Table S6). In PC1, which accounts for 42% of variance, salinity was the dominant factor (loading 0.45). All studied biological variables had high loadings the PC1, indicating that salinity was the major factor affecting clam biology. Exposure time dominated PC2 (a loading of 0.76) and primarily affected mortality and shell mass (supplementary material Table S6). In contrast,  $P_{\text{CO}_2}$  had the highest loading (0.96) on PC3, which accounted for 15% of the variance, and was weakly associated with the tissue mass and SMR (loadings of 0.18 and 0.21, respectively). An overview of the putative relationships between the experimental factors and studied biological traits based on the results of correlation analysis and PCA is shown in Fig. 7.

#### DISCUSSION

Combined exposure to elevated  $P_{\text{CO}_2}$  and reduced salinity strongly affected growth, bioenergetics and biomineralization of juvenile hard

shell clams. Under the conditions of this study, salinity exerted a dominant influence on growth and bioenergetics of hard-shell clams and significantly modified how shell structural and mechanical properties responded to elevated  $P_{\text{CO}_2}$ . In contrast, the direct effects of  $P_{\text{CO}_2}$  on biomineralization and physiology of *M. mercenaria* were small in comparison to those of salinity. This may reflect high tolerance of hard-shell clams to  $P_{\text{CO}_2}$  variations in the range tested in this study, but may also partially reflect the non-linear effects of  $P_{\text{CO}_2}$  on some studied biological traits.

Acclimation of juvenile clams to low salinity resulted in a strong increase of SMR during the mid-term experimental exposures (8–11 weeks), indicating elevated basal maintenance cost in these organisms. During this period, SMR of clams from the low salinity group were approximately three times higher than in their high salinity counterparts and approximately eight to 10 times higher than during the initial exposure to low salinity. Notably, low salinity exposure also led to an increase in activity of carbonic anhydrase in gills, possibly reflecting an elevated need for gas exchange due to the higher SMR. Elevated costs of basal maintenance typically

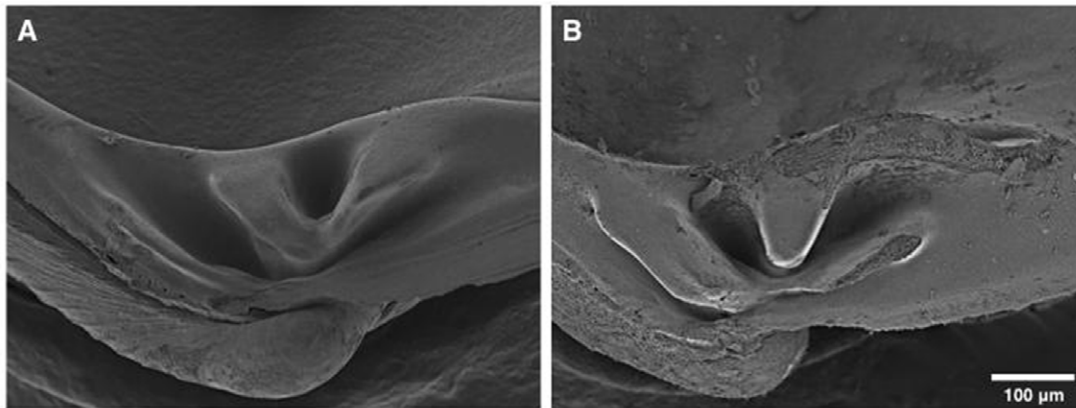

Fig. 6. SEM micrographs of the interior of the hinge region of *M. mercenaria* shells after 16 weeks exposure to experimental conditions. (A) 395  $\mu\text{atm}$ , salinity 32; (B) 1500  $\mu\text{atm}$ , salinity 16.

result in reduced aerobic scope for fitness-related functions including growth (Sokolova et al., 2011; Sokolova et al., 2012), and a negative relationship between SMR and growth rate is commonly found in marine bivalves (Hawkins et al., 1986; Awkins and Day, 1996; Bayne and Hawkins, 1997; Fraser and Rogers, 2007).

The high energy cost of basal maintenance also goes hand-in-hand with elevated mortality and reduced shell and tissue mass in clams exposed to low salinity, indicating that energy deficiency may contribute to the reduced growth and survival of this group. A similar increase in mortality associated with the depletion of energy stores has been observed in juvenile oysters during the combined exposure to low salinity and high  $\text{CO}_2$  levels (Dickinson et al., 2012). In the present study, SMR was slightly reduced after 21 weeks of exposure at low salinity conditions (even though it still remained significantly above the control levels and above SMR recorded during the initial period of low salinity exposure). This moderate reduction in SMR after the long-term exposure to low salinity may reflect physiological acclimation; however, if true, this would indicate an unusually slow acclimation process in juvenile hard-shell clams. Typically, physiological acclimation to salinity shifts is completed and a new metabolic steady state is achieved within 3 to 6 weeks in marine mollusks (Berger, 1986; Prosser, 1991; Berger and Kharazova, 1997). Alternatively, a decrease in SMR after 21 weeks in low salinity may be due to the selective mortality of experimental clams, as the individuals with highest SMR are expected to develop the strongest energy deficiency and therefore will be most prone to salinity-induced stress. Indeed, earlier studies in marine bivalves showed that individuals with lower SMR are more resistant to environmental stress and have higher survivorship under the stress conditions (Hawkins et al., 1986; Myrand et al., 2002).

The shell mass of clams was affected by  $P_{\text{CO}_2}$  and  $\Omega_{\text{Arg}}$  in a non-linear manner. At moderately elevated  $P_{\text{CO}_2}$  ( $\sim 800 \mu\text{atm}$ , salinity 32) we observed an increase in shell mass of clams compared with their normocapnic counterparts. However, the average shell mass of clams exposed to extreme  $P_{\text{CO}_2}$  ( $\sim 1500 \mu\text{atm}$ , salinity 32) was similar to that of those maintained in normocapnia. These observations indicate that moderate acidification can increase rates of shell deposition in this species, while further increase in  $P_{\text{CO}_2}$  abolishes this effect. This ‘bell-shaped’ response is even more apparent when the mass data are plotted against aragonite saturation levels corresponding to each experimental condition. The exact physiological mechanisms of this apparent increase in shell

deposition rates under the moderately hypercapnic conditions are currently not known. However, a similar bell-shaped response of calcification rates to increasing  $P_{\text{CO}_2}$  and decreasing in  $\Omega_{\text{Arg}}$  has been previously reported for other species of marine calcifiers (Doney et al., 2009; Ries et al., 2009). Interestingly, many other species, including eastern oysters (*Crassostrea virginica*) demonstrate a very different biomineralization response to changes of  $P_{\text{CO}_2}$ , with a linear decrease of shell deposition rates with increasing  $\text{CO}_2$  levels (Ries et al., 2009; Beniash et al., 2010). This is especially noteworthy in light of the fact that the shells of eastern oysters are made of calcite, which is a more thermodynamically stable  $\text{CaCO}_3$  isoform, with a higher degree of saturation than that of aragonite under any given set of conditions. Hence, these differences in response of clams and oysters to elevated  $P_{\text{CO}_2}$  indicate that biological factors may play a more significant role in the shell deposition of these species than physicochemical properties of seawater, and that biological mechanisms of biomineralization are different in these bivalve species.

Environmental  $P_{\text{CO}_2}$  and salinity conditions also had profound effects on shell structure and mechanical properties of juvenile clams. Exposure to conditions where aragonite saturation was below 1 (i.e. elevated  $P_{\text{CO}_2}$  and low salinity) caused significant etching of the shells’ exterior surfaces. In all experimental groups in which  $\Omega_{\text{Arg}}$  was above 1, the etching of the exterior was relatively modest, suggesting that erosion of the shell exterior is primarily affected by hydrochemistry. This chemical dissolution of the shells may have also contributed to the observed decrease in the shell mass of clams from the low salinity treatments compared with their counterparts maintained at high salinity. Indeed, experiments by Nienhuis and colleagues (Nienhuis et al., 2010) demonstrated that a decrease in the rate of shell growth in *Nucella lamellosa* under elevated  $\text{CO}_2$  conditions is primarily caused by higher rates of shell dissolution and not a decrease in the shell deposition rates. In the case of *M. mercenaria*, these relationships appeared more complex, as a moderate increase in the  $\text{CO}_2$  levels led to an increase in the shell deposition rate. However, it is likely that at low  $\Omega_{\text{Arg}}$  levels dissolution plays a major role in the mass balance of the shells. Shell erosion may become a major factor affecting survival of bivalves in brackish coastal and estuarine waters by weakening the shells and making them more vulnerable to predators (Green et al., 2009; Amaral et al., 2012).

Interestingly, etching of the shell interior was observed in all groups with elevated  $P_{\text{CO}_2}$  even under the supersaturation conditions

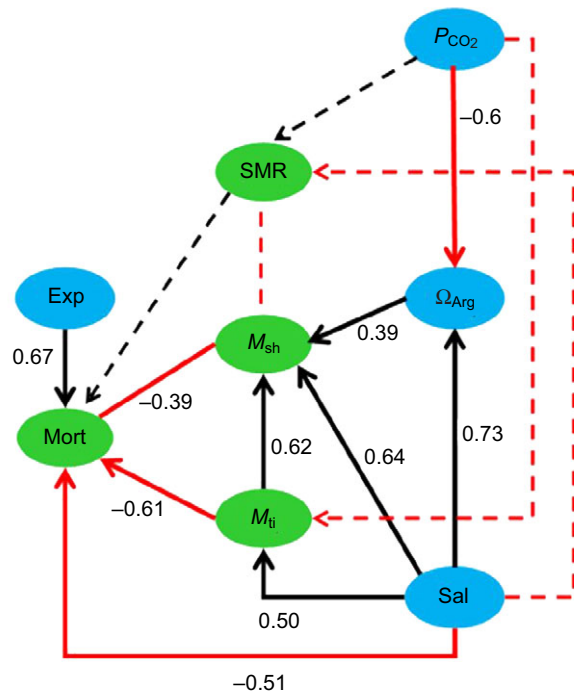

Fig. 7. A schematic representation of the relationships between the environmental factors (blue ovals) and the studied biological traits (green ovals). Black and red connector lines represent relationships with positive and negative correlations, respectively. Solid lines represent significant correlations (based on Pearson correlation analysis). Dashed lines represent relationships that did not show significant Pearson correlation coefficients but were identified as important by PCA. Arrows identify putative causality and numbers by the connector lines are Pearson correlation coefficients ( $R$ ). Abbreviations:  $P_{CO_2}$ , partial pressure of CO<sub>2</sub>; Exp, duration of experimental exposure;  $\Omega_{Arg}$ , aragonite saturation; Sal, salinity;  $M_{ti}$ , tissue mass;  $M_{sh}$ , shell mass; SMR, standard metabolic rate; Mort, mortality.

for aragonite. These observations indicate that etching of the shells' interior is not directly related to the water chemistry. One possible explanation is that the mollusks dissolve the interior of the shells to compensate for the effects of CO<sub>2</sub>-induced acidosis in the tissues as described in mollusks (Crenshaw, 1972; Sokolova et al., 2000). SEM analysis of the shells has also revealed that at low  $\Omega_{Arg}$  values, a significant erosion of the material in the hinge area occurred, leading to weakening of the ligament insertion site and separation of the shell valves. This, in turn, can lead to a major impediment of the shell opening mechanism and affect growth and survival of the mollusks. Our observations are in agreement with an earlier report of compromised hinge structures in juvenile clams maintained under low aragonite saturation conditions (Talmage and Gobler, 2010).

Salinity and  $\Omega_{Arg}$  had much less of an effect on microhardness of the shells than  $P_{CO_2}$ . For example, the shell microhardness of the clams exposed to normocapnia at low salinity was not significantly different from that of the high salinity normocapnic controls, although there was a threefold difference in  $\Omega_{Arg}$  between these two experimental conditions. At the same time, microhardness of the shells of clams exposed to elevated CO<sub>2</sub> levels was significantly lower than in those from normocapnic treatments. Notably, fracture toughness of the shells of clams exposed to ~800  $\mu\text{atm}$   $P_{CO_2}$  at high salinity did not differ from that of the normocapnic controls (salinity 32, ~395  $\mu\text{atm}$   $P_{CO_2}$ ), despite having significantly lower hardness.

The fracture toughness in the shells from the ~1500  $\mu\text{atm}$ , low salinity group also did not differ significantly from that of the control group, likely reflecting the effect of increased shell porosity in limiting crack propagation (Shigegaki et al., 1997; Xu et al., 2001). Taken together, these data indicate that factors other than chemical erosion contributed to the differences in shell hardness and fracture toughness in clams exposed to different salinity and  $P_{CO_2}$  levels. It is possible that elevated CO<sub>2</sub> may affect the structural organization of the shell mineral and organic components and/or the proportion of the organic matrix to the mineral in the shell, which in turn will affect its mechanical properties. Determination of the precise biological and structural mechanisms underlying these effects of elevated  $P_{CO_2}$  is outside the scope of this study and requires further investigation.

As a corollary, our study demonstrates complex interactive effects of salinity and  $P_{CO_2}$  on physiology and biomineralization of hard-shell clams. The major effects of low salinity under the conditions of this study are driven by the elevated basal energy demand that can lead to energy deficiency, reduced growth and elevated mortality of juvenile clams, and possibly to impaired shell maintenance, as evidenced by the extensive damage to the periostracum at low salinity. The effects of elevated  $P_{CO_2}$  on the physiology and biomineralization of hard-shell clams appear to be more complex and subtle. The metabolic effects of high  $P_{CO_2}$  in the studied range (~380–1500  $\mu\text{atm}$ ) are minimal, while the most pronounced changes are seen with respect to the growth and mechanical properties of the shell. Effects of elevated  $P_{CO_2}$  on biomineralization of hard-shell clams involve a complex interplay between the chemical effects of corrosive seawater and biological responses to elevated  $P_{CO_2}$  and/or reduced  $\Omega_{Arg}$ . Moderate hypercapnia (~800  $\mu\text{atm}$   $P_{CO_2}$ ) appears to stimulate shell and tissue growth and reduce mortality of juvenile clams; however, exposure to low salinity or extreme hypercapnia (~1500  $\mu\text{atm}$   $P_{CO_2}$ ) abates these effects. Mechanical properties of the shell (such as microhardness and fracture toughness) are negatively affected by elevated CO<sub>2</sub> alone or in combination with low salinity, which may have important implications for protection against predators or environmental stressors. Overall, our data indicate that environmental salinity may strongly modulate responses to ocean acidification in hard-shell clams as well as other marine bivalves (Dickinson et al., 2012) and thus should be taken into account when predicting the effects of ocean acidification on estuarine ecosystems.

#### ACKNOWLEDGEMENTS

We thank Anna Ivanina for the help with experimental exposures, and two anonymous reviewers for the useful comments on an earlier version of this manuscript.

#### AUTHOR CONTRIBUTIONS

I.M.S. and E.B. designed the study and supervised the experiments on bioenergetics and biomineralization, respectively. R.T.T. prepared the shells for the structural and mechanical studies and was involved in data collection. G.H.D. analysed the shell and tissue masses, as well as structural and mechanical properties of the shells. O.B.M. conducted the experimental exposures and measured mortalities and respiration rates of the clams. I.M.S., E.B., G.H.D. and O.B.M. participated in data analysis and interpretation, and in writing and revising the manuscript.

#### COMPETING INTERESTS

No competing interests declared.

#### FUNDING

This work was supported by funds provided by National Science Foundation award IOS-0951079 to I.M.S. and E.B.

## REFERENCES

- Addadi, L., Joester, D., Nudelman, F. and Weiner, S. (2006). Mollusk shell formation: a source of new concepts for understanding biomineralization processes. *Chemistry* **12**, 980-987.
- Amaral, V., Cabral, H. N. and Bishop, M. J. (2011). Resistance among wild invertebrate populations to recurrent estuarine acidification. *Estuar. Coast. Shelf Sci.* **93**, 460-467.
- Amaral, V., Cabral, H. N. and Bishop, M. J. (2012). Effects of estuarine acidification on predator-prey interactions. *Mar. Ecol. Prog. Ser.* **445**, 117-127.
- Anstis, G. R., Chantikul, P., Lawn, B. R. and Marshall, D. B. (1981). A critical evaluation of indentation techniques for measuring fracture toughness: I. Direct crack measurements. *J. Am. Ceram. Soc.* **64**, 533-538.
- Baldassarri, M., Margolis, H. C. and Beniash, E. (2008). Compositional determinants of mechanical properties of enamel. *J. Dent. Res.* **87**, 645-649.
- Bayne, B. L. and Hawkins, A. J. S. (1997). Protein metabolisms the costs of growth and genomic heterozygosity: experiments with the mussel *Mytilus galloprovincialis* Lmk. *Physiol. Zool.* **70**, 391-402.
- Beniash, E., Aizenberg, J., Addadi, L. and Weiner, S. (1997). Amorphous calcium carbonate transforms into calcite during sea urchin larval spicule growth. *Proc. R. Soc. B* **264**, 461-465.
- Beniash, E., Ivanina, A., Lieb, N. S., Kurochkin, I. and Sokolova, I. M. (2010). Elevated levels of carbon dioxide affect metabolism and shell formation in oysters *Crassostrea virginica*. *Mar. Ecol. Prog. Ser.* **419**, 95-108.
- Berger, V. J. (1986). *Adaptations of Marine Molluscs to Changes of Environmental Salinity*, pp. 216. Leningrad: Nauka Publishing House.
- Berger, V. J. and Kharazova, A. D. (1997). Mechanisms of salinity adaptations in marine molluscs. *Hydrobiologia* **355**, 115-126.
- Burnett, L. E. (1997). The challenges of living in hypoxic and hypercapnic aquatic environments. *Am. Zool.* **37**, 633-640.
- Byrne, M., Ho, M., Wong, E., Soars, N. A., Selvakumaraswamy, P., Shepard-Brennan, H., Dworjany, S. A. and Davis, A. R. (2011). Unshelled abalone and corrupted urchins: development of marine calcifiers in a changing ocean. *Proc. Biol. Sci.* **278**, 2376-2383.
- Cai, W. J. and Wang, Y. (1998). The chemistry, fluxes, and sources of carbon dioxide in the estuarine waters of the Satilla and Altamaha Rivers, Georgia. *Limnol. Oceanogr.* **43**, 657-668.
- Cooley, S. and Doney, S. (2009). Anticipating ocean acidification's economic consequences for commercial fisheries. *Environ. Res. Lett.* **4**, 1-8.
- Crenshaw, M. A. (1972). The inorganic composition of molluscan extrapallial fluid. *Biol. Bull.* **143**, 506-512.
- Currey, J. D. and Taylor, J. D. (1974). The mechanical behaviour of some molluscan hard tissues. *J. Zool.* **173**, 395-406.
- Dickinson, G. H., Ivanina, A. V., Matoo, O. B., Pörtner, H.-O., Lannig, G., Bock, C., Beniash, E. and Sokolova, I. M. (2012). Interactive effects of salinity and elevated CO<sub>2</sub> levels on juvenile eastern oysters, *Crassostrea virginica*. *J. Exp. Biol.* **215**, 29-43.
- Dickson, A. G. (1990). Standard potential of the AgCl(s) + 1/2H<sub>2</sub>(g) = Ag(s) + HCl(aq) cell and the dissociation constant of bisulfate ion in synthetic sea water from 273.15 to 318.15 K. *J. Chem. Thermodyn.* **22**, 113-127.
- Doney, S. C., Fabry, V. J., Feely, R. A. and Kleypas, J. A. (2009). Ocean acidification: the other CO<sub>2</sub> problem. *Annu. Rev. Mar. Sci.* **1**, 169-192.
- Dupont, S., Dorey, N. and Thorndyke, M. (2010). What meta-analysis can tell us about vulnerability of marine biodiversity to ocean acidification? *Estuar. Coast. Shelf Sci.* **89**, 182-185.
- Fraser, K. P. P. and Rogers, A. D. (2007). Protein metabolism in marine animals: the underlying mechanism of growth. *Adv. Mar. Biol.* **52**, 267-362.
- Gazeau, F., Quiblier, C., Jansen, J. M., Gattuso, J. P., Middelburg, J. J. and Heip, C. H. R. (2007). Impact of elevated CO<sub>2</sub> on shellfish calcification. *Geophys. Res. Lett.* **34**, L07603.
- Green, M. A., Waldbusser, G. G., Reilly, S. L., Emerson, K. and O'Donnell, S. (2009). Death by dissolution: sediment saturation state as a mortality factor for juvenile bivalves. *Limnol. Oceanogr.* **54**, 1037-1047.
- Gueta, R., Natan, A., Addadi, L., Weiner, S., Refson, K. and Kronik, L. (2007). Local atomic order and infrared spectra of biogenic calcite. *Angew. Chem. Int. Ed.* **46**, 291-294.
- Gutiérrez, J. L., Jones, C. G., Strayer, D. L. and Iribarne, O. O. (2003). Mollusks as ecosystem engineers: the role of shell production in aquatic habitats. *Oikos* **101**, 79-90.
- Hawkins, A. J. S. and Day, A. J. (1996). The metabolic basis of genetic differences in growth efficiency among marine animals. *J. Exp. Mar. Biol. Ecol.* **203**, 93-115.
- Hawkins, A. J. S., Bayne, B. L. and Day, A. J. (1986). Protein turnover, physiological energetics and heterozygosity in the blue mussel, *mytilus edulis*: the basis of variable age-specific growth. *Proc. R. Soc. B* **229**, 161-176.
- Kleypas, J. A., Feely, R. A., Fabry, V. J., Langdon, C., Sabine, C. L. and Robbins, L. L. (2006). *Impacts of Ocean Acidification on Coral Reefs and Other Marine Calcifiers. A Guide for Future Research*. Report of a workshop sponsored by NSF, NOAA and the US Geological Survey. Boulder, CO: Institute for the Study of Society and Environment (ISSE) of the University Corporation for Atmospheric Research (UCAR).
- Kochmann, J., Buschbaum, C., Volkenborn, N. and Reise, K. (2008). Shift from native mussels to alien oysters: differential effects of ecosystem engineers. *J. Exp. Mar. Biol. Ecol.* **364**, 1-10.
- Kraeuter, J. N. and Castagna, M. E. (2001). *Biology of the Hard Clam*. Amsterdam: Elsevier Science.
- Kroeker, K. J., Kordas, R. L., Crim, R. N. and Singh, G. G. (2010). Meta-analysis reveals negative yet variable effects of ocean acidification on marine organisms. *Ecol. Lett.* **13**, 1419-1434.
- Lannig, G., Flores, J. F. and Sokolova, I. M. (2006). Temperature-dependent stress response in oysters, *Crassostrea virginica*: pollution reduces temperature tolerance in oysters. *Aquat. Toxicol.* **79**, 278-287.
- Lannig, G., Eilers, S., Pörtner, H.-O., Sokolova, I. M. and Bock, C. (2010). Impact of ocean acidification on energy metabolism of oyster, *Crassostrea gigas* – changes in metabolic pathways and thermal response. *Mar. Drugs* **8**, 2318-2339.
- Lewis, E. and Wallace, D. W. R. (1998). *Program Developed for CO<sub>2</sub> System Calculations*. ORNL/CDIAC-105. Oak Ridge, TN: Department of Energy, Carbon Dioxide Information Analysis Center, Oak Ridge National Laboratory.
- McElhany, P. and Shalini Busch, D. (2012). Appropriate pCO<sub>2</sub> treatments in ocean acidification experiments. *Mar. Biol.* (in press) doi: 10.1007/s00227-012-2052-0.
- Millero, F. J., Graham, T. B., Huang, F., Bustos-Serrano, H. and Pierrot, D. (2006). Dissociation constants of carbonic acid in seawater as a function of salinity and temperature. *Mar. Chem.* **100**, 80-94.
- Mook, W. G. and Koene, B. K. S. (1975). Chemistry of dissolved inorganic carbon in estuarine and coastal brackish waters. *Estuar. Coast. Mar. Sci.* **3**, 325-336.
- Myrand, B., Tremblay, R. and Sévigny, J.-M. (2002). Selection against blue mussels (*Mytilus edulis* L.) homozygotes under various stressful conditions. *J. Hered.* **93**, 238-248.
- Najjar, R. G., Pyke, C. R., Adams, M. B., Breitburg, D., Hershner, C., Kemp, M., Howarth, R., Mulholland, M. R., Paolisso, M., Secor, D. et al. (2010). Potential climate-change impacts on the Chesapeake Bay. *Estuar. Coast. Shelf Sci.* **86**, 1-20.
- Nienhuis, S., Palmer, A. R. and Harley, C. D. G. (2010). Elevated CO<sub>2</sub> affects shell dissolution rate but not calcification rate in a marine snail. *Proc. Biol. Sci.* **277**, 2553-2558.
- Nikinmaa, M. (2013). Climate change and ocean acidification-interactions with aquatic toxicology. *Aquat. Toxicol.* **126**, 365-372.
- Pörtner, H.-O. (2008). Ecosystem effects of ocean acidification in times of ocean warming: a physiologist's view. *Mar. Ecol. Prog. Ser.* **373**, 203-217.
- Pörtner, H.-O. (2012). Integrating climate-related stressor effects on marine organisms: unifying principles linking molecule to ecosystem-level changes. *Mar. Ecol. Prog. Ser.* **470**, 273-290.
- Prosser, C. L. (1991). *Environmental and Metabolic Animal Physiology*. New York, NY: Wiley-Liss.
- Przeslawski, R., Ahnyong, S., Byrne, M., Worheide, G. and Hutchings, P. (2008). Beyond corals and fish: the effects of climate change on noncoral benthic invertebrates of tropical reefs. *Glob. Change Biol.* **14**, 2773-2795.
- Ries, J. B., Cohen, A. L. and McCorkle, D. C. (2009). Marine calcifiers exhibit mixed responses to CO<sub>2</sub>-induced ocean acidification. *Geology* **37**, 1131-1134.
- Ringwood, A. H. and Keppler, C. J. (2002). Water quality variation and clam growth: is pH really a non-issue in estuaries? *Estuaries* **25**, 901-907.
- Shigegaki, Y., Brito, M. E., Hirao, K., Toriyama, M. and Kanzaki, S. (1997). Strain tolerant porous silicon nitride. *J. Am. Ceram. Soc.* **80**, 495-498.
- Sokolova, I. M., Bock, C. and Pörtner, H.-O. (2000). Resistance to freshwater exposure in White Sea *Littorina* spp. II: Acid-base regulation. *J. Comp. Physiol. B* **170**, 105-115.
- Sokolova, I. M., Sukhotin, A. A. and Lannig, G. (2011). Stress effects on metabolism and energy budgets in mollusks. In: *Oxidative Stress in Aquatic Ecosystems* (ed. D. Abele, T. Zenteno-Savin and J. Vazquez-Medina), pp. 263-280. Boston, MA: Blackwell Wiley.
- Sokolova, I. M., Frederich, M., Bagwe, R., Lannig, G. and Sukhotin, A. A. (2012). Energy homeostasis as an integrative tool for assessing limits of environmental stress tolerance in aquatic invertebrates. *Mar. Environ. Res.* **79**, 1-15.
- Stanley, S. M. (2006). Influence of seawater chemistry on biomineralization throughout phanerozoic time: paleontological and experimental evidence. *Palaeogeogr. Palaeoclimatol. Palaeoecol.* **232**, 214-236.
- Talmage, S. C. and Gobler, C. J. (2010). Effects of past, present, and future ocean carbon dioxide concentrations on the growth and survival of larval shellfish. *Proc. Natl. Acad. Sci. USA* **107**, 17246-17251.
- Thomsen, J., Gutowska, M. A., Saphörster, J., Heinemann, A., Trübenbach, K., Fietzke, J., Hiebenthal, C., Eisenhauer, A., Körtzinger, A., Wahl, M. et al. (2010). Calcifying invertebrates succeed in a naturally CO<sub>2</sub>-rich coastal habitat but are threatened by high levels of future acidification. *Biogeosciences* **7**, 3879-3891.
- Tomaneck, L., Zuzow, M. J., Ivanina, A. V., Beniash, E. and Sokolova, I. M. (2011). Proteomic response to elevated PCO<sub>2</sub> level in eastern oysters, *Crassostrea virginica*: evidence for oxidative stress. *J. Exp. Biol.* **214**, 1836-1844.
- Waldbusser, G., Voigt, E., Bergschneider, H., Green, M. and Newell, R. (2011). Biocalcification in the eastern oyster (*Crassostrea virginica*) in relation to long-term trends in Chesapeake Bay pH. *Estuaries Coasts* **34**, 221-231.
- Xu, H. H. K., Quinn, J. B., Takagi, S., Chow, L. C. and Eichmiller, F. C. (2001). Strong and macroporous calcium phosphate cement: effects of porosity and fiber reinforcement on mechanical properties. *J. Biomed. Mater. Res.* **57**, 457-466.
